# Supplementary material for: Opportunities lost: Barriers to increasing the use of effective contraception in the Philippines
Source: PLOS journal article supplement (doi:10.1371/journal.pone.0218187), 2019-07-25
Supplement: S1 (10.1371/journal.pone.0218187.s001) [file journal.pone.0218187.s001]

RESPONDENT NUMBER:

|        |          |          |      |         |                |
|--------|----------|----------|------|---------|----------------|
|        |          |          |      |         |                |
| Region | Province | City/Mun | Brgy | Fac. No | Respondent No. |

As of July, 19 2017

# COVER PAGE

FORM1. Interview Women of Reproductive Age Who Are Not Currently Pregnant or within 6 Weeks of Delivery, and Desire Delaying or Limiting Childbearing.

**[Fill one number for each woman contacted in the order they were contacted at the health facility; if done over several days, continue unique sequence numbers]**

|                                                                              |                                                                                                                                                                                                                                                                                                                                                                                                            |           |
|------------------------------------------------------------------------------|------------------------------------------------------------------------------------------------------------------------------------------------------------------------------------------------------------------------------------------------------------------------------------------------------------------------------------------------------------------------------------------------------------|-----------|
| <b>Identification of interview place</b>                                     |                                                                                                                                                                                                                                                                                                                                                                                                            |           |
| Region                                                                       |                                                                                                                                                                                                                                                                                                                                                                                                            |           |
| Province                                                                     |                                                                                                                                                                                                                                                                                                                                                                                                            |           |
| City/Municipality                                                            |                                                                                                                                                                                                                                                                                                                                                                                                            |           |
| Barangay                                                                     |                                                                                                                                                                                                                                                                                                                                                                                                            |           |
| Health facility name                                                         |                                                                                                                                                                                                                                                                                                                                                                                                            |           |
| Home address <b>(for home visit only)</b>                                    |                                                                                                                                                                                                                                                                                                                                                                                                            |           |
| Latitude and longitude<br>(Use the coordinate of GPS in a mobile phone)      | Latitude                                                                                                                                                                                                                                                                                                                                                                                                   | Longitude |
| <b>Interview Record</b>                                                      |                                                                                                                                                                                                                                                                                                                                                                                                            |           |
| Date of interview<br><b>(dd/mm/yyyy)</b>                                     |                                                                                                                                                                                                                                                                                                                                                                                                            |           |
| Interviewer's name <b>(Last Name, First Name, Middle Initial)</b>            |                                                                                                                                                                                                                                                                                                                                                                                                            |           |
| Health facility level where interview took place                             | <b>Public Sector</b><br>1. Government hospital<br>2. Rural health unit/Urban health center/Barangay health center<br>3. Barangay health station<br>4. Barangay supply/Service point office/BHW<br>5. Other public (specify) _____<br><br><b>Other places</b><br>6. Puericulture center<br>7. Others (specify) _____                                                                                        |           |
| <b>FOR LARGE HOSPITALS</b><br><b>Reason for visiting the health facility</b> | 1. Reproductive health clinic for postnatal care<br>2. Reproductive health clinic not related to postnatal care<br>3. Receiving vaccination or routine check-up for <b>child &lt;5 years old</b><br>4. Seeking medical advice or treatment for sickness or injury of child <b>&lt;5 years old</b><br>5. Seeking medical advice or treatment for sickness or injury of herself<br>6. Others (specify) _____ |           |

RESPONDENT NUMBER:

|        |          |           |      |              |                |
|--------|----------|-----------|------|--------------|----------------|
|        |          |           |      |              |                |
| Region | Province | City/ Mun | Brgy | Facility no. | Respondent No. |

## SCREENING FORM

**[CONSIDER ALL THE WOMEN AT THE HEALTH FACILITY AS OUR TARGET. THEN WE SCREEN THOSE WOMEN THROUGH Q001-010.]**

State: "We would like to start by asking a few questions that determine if you are eligible for the survey."

|     |                                                                                                                                                                                                                                                                                                                                                                                                      |                                                                                                                                                        | Answer |                                                                                          |
|-----|------------------------------------------------------------------------------------------------------------------------------------------------------------------------------------------------------------------------------------------------------------------------------------------------------------------------------------------------------------------------------------------------------|--------------------------------------------------------------------------------------------------------------------------------------------------------|--------|------------------------------------------------------------------------------------------|
| 001 | How old were you on your last birthday?                                                                                                                                                                                                                                                                                                                                                              | Age in completed years                                                                                                                                 |        | 18-49 years ->002<br>Others -> 010                                                       |
| 002 | Are you pregnant now?<br>(Stop the interview)                                                                                                                                                                                                                                                                                                                                                        | 1. Yes<br>2. No<br>3. Unsure                                                                                                                           |        | 1 ->010<br>2 ->003<br>3 ->003                                                            |
| 003 | What is the name of your last baby?<br>Record name                                                                                                                                                                                                                                                                                                                                                   | 1. Name: _____<br>2. No previous baby                                                                                                                  |        | 1 ->004<br>2 ->006                                                                       |
| 004 | In what month and year was NAME born?<br>If less than 6 weeks. Stop the interview.                                                                                                                                                                                                                                                                                                                   | Month : __ __<br><br>Year : __ __ __ __                                                                                                                |        | Age ≥6 weeks ->005<br>Age<6 weeks ->010                                                  |
| 005 | Has your menstrual period returned since the birth of _____ (NAME)?                                                                                                                                                                                                                                                                                                                                  | 1. Yes<br>2. No<br>3.                                                                                                                                  |        | 1 ->006<br>2 ->006                                                                       |
| 006 | Now, I have some questions about the future. Would you like to have (a/another) child, or would you prefer not to have any (more) children?                                                                                                                                                                                                                                                          | 1. Have (a/another ) child<br>2. No more/none<br>3. Cannot get pregnant (due to tubal ligation)<br>4. Cannot get pregnant<br>5. Undecided / don't know |        | 1 -> 007<br>2 -> 008<br>3 -> 101 (count this woman as a FP user)<br>4 -> 010<br>5 -> 010 |
| 007 | Do you want (a/another) child soon?                                                                                                                                                                                                                                                                                                                                                                  | 1. Yes<br>2. No, want to wait<br>3. Don't know                                                                                                         |        | 1 ->010<br>2 ->008<br>3- ->010                                                           |
| 008 | Are you or your husband/partner currently doing something or using any method to delay or avoid getting pregnant?                                                                                                                                                                                                                                                                                    | 1. Yes<br>2. No                                                                                                                                        |        | 1 -> 009<br>2 -> 101 (Count this woman as a non-FP user)                                 |
| 009 | Which method are you or your husband using?                                                                                                                                                                                                                                                                                                                                                          | 1. Pill, Injectable, Patch, IUD, Implants, or Sterilization<br>2. Others                                                                               |        | 1 -> 101 (Count this woman as a FP user)<br>2 -> 101 (Count this woman as a non-FP user) |
| 010 | Thank the woman, indicate ineligibility for the survey and stop the interview. <b>[STAPLE THE SCREENING PAGE OF THE ELIGIBLE MOTHER IN HER QUESTIONNAIRE. PLACE THE SCREENING FORM OF THE INELIGIBLE WOMAN IN THE ENVELOPE MARKED "INELIGIBLE RESPONDENTS".</b> Enter this woman into the list of "number of women contacted". Then find another woman to interview and use another screening sheet. |                                                                                                                                                        |        |                                                                                          |

RESPONDENT NUMBER:

|        |          |           |      |              |                |
|--------|----------|-----------|------|--------------|----------------|
|        |          |           |      |              |                |
| Region | Province | City/ Mun | Brgy | Facility no. | Respondent No. |

## QUESTIONNAIRE

FORM1. Interview of women of reproductive age who are not currently pregnant or within 6 weeks of delivery, and desire delaying or limiting childbearing.

**[READ THE INFORMED CONSENT FORM AND REQUEST THE MOTHER TO SIGN THE FORM]**

| NO. | Section 1. Respondent background                                                                                                                                                                                              |                                                                                                                                                                                                                                                                                                |                     |
|-----|-------------------------------------------------------------------------------------------------------------------------------------------------------------------------------------------------------------------------------|------------------------------------------------------------------------------------------------------------------------------------------------------------------------------------------------------------------------------------------------------------------------------------------------|---------------------|
| 101 | In (month of interview) 2017, did you live in a city, in a town proper/ <i>Poblacion</i> , in an urban barangay or rural barangay, or abroad?                                                                                 | 1. City (City)<br>2. Town Proper/ <i>Poblacion</i><br>3. Urban Barangay<br>4. Rural barangay<br>5. Abroad ( <i>Abroad</i> )<br>6. Don't Know                                                                                                                                                   | ->102               |
| 102 | What is your marital status now?                                                                                                                                                                                              | 1. Never married or never lived with a man<br>2. Currently married<br>3. Currently living with a man<br>4. Divorced/separated/widow and not currently living with a man                                                                                                                        | ->103               |
| 103 | What is your highest level of education attended, whether or not that level was completed?                                                                                                                                    | 1. No education<br>2. Elementary<br>3. High school<br>4. Vocational<br>5. College<br>6. Post-graduate                                                                                                                                                                                          | ->104               |
| 104 | How many children do you have who are still alive?                                                                                                                                                                            | Number of children alive                                                                                                                                                                                                                                                                       | ->105               |
| 105 | Women sometimes have pregnancies that do not result in a live born child. That is, a pregnancy can end early, in a miscarriage or the child can be born dead. Have you ever had a pregnancy that did not end in a live birth? | 1. Yes<br>2. No                                                                                                                                                                                                                                                                                | 1 ->106<br>2 -> 107 |
| 106 | In all, how many pregnancies have you had that did not end in a live born child?<br><b>[WRITE DOWN NUMBER OF SPONTANEOUS ABORTION AND INDUCED ABORTION SEPARATELY]</b>                                                        | A. Number of pregnancy losses by spontaneous abortion ( <i>nalaglag</i> ).<br>B. Number of pregnancy losses by induced abortion ( <i>inilaglag</i> )                                                                                                                                           | ->107               |
| 107 | Are you covered by any health insurance, either as member or dependent?<br><b>[WRITE DOWN ALL MENTIONED.]</b>                                                                                                                 | 1. Not covered<br>2. Philhealth<br>3. Government Service Insurance System (GSIS)<br>4. Social Security System (SSS)<br>5. Private insurance company/Health (maintenance organization /Pre-need insurance plan company<br>6. LGU card with monthly fee<br>7. LGU card for free to the residents | ->201               |

RESPONDENT NUMBER:

|        |          |          |      |         |                |
|--------|----------|----------|------|---------|----------------|
|        |          |          |      |         |                |
| Region | Province | City/Mun | Brgy | Fac. No | Respondent No. |

| NO.                                                                                                                                                                                                                                                                                                                                                                                                                                                                                    | Section 2. Current use of FP                                                                                                                                                                                                                    |                                                                                                                                                                                                                                                                                                                                                                                                                                                                          |    |                                                                                                                                                                                                                                                 |                 |                                                                                                                                                                                                                                                                                                                                                                                                                                                                                                                                    |
|----------------------------------------------------------------------------------------------------------------------------------------------------------------------------------------------------------------------------------------------------------------------------------------------------------------------------------------------------------------------------------------------------------------------------------------------------------------------------------------|-------------------------------------------------------------------------------------------------------------------------------------------------------------------------------------------------------------------------------------------------|--------------------------------------------------------------------------------------------------------------------------------------------------------------------------------------------------------------------------------------------------------------------------------------------------------------------------------------------------------------------------------------------------------------------------------------------------------------------------|----|-------------------------------------------------------------------------------------------------------------------------------------------------------------------------------------------------------------------------------------------------|-----------------|------------------------------------------------------------------------------------------------------------------------------------------------------------------------------------------------------------------------------------------------------------------------------------------------------------------------------------------------------------------------------------------------------------------------------------------------------------------------------------------------------------------------------------|
| 201                                                                                                                                                                                                                                                                                                                                                                                                                                                                                    | REVIEW: Are you or your husband/partner currently doing something or using any method to delay or avoid getting pregnant?                                                                                                                       |                                                                                                                                                                                                                                                                                                                                                                                                                                                                          |    |                                                                                                                                                                                                                                                 | 1. Yes<br>2. No | 1 ->202<br>2 ->207                                                                                                                                                                                                                                                                                                                                                                                                                                                                                                                 |
| 202                                                                                                                                                                                                                                                                                                                                                                                                                                                                                    | Which method are you currently using? [WRITE DOWN ALL MENTIONED SEPARATED BY COMMA.]                                                                                                                                                            |                                                                                                                                                                                                                                                                                                                                                                                                                                                                          |    |                                                                                                                                                                                                                                                 |                 | ->203                                                                                                                                                                                                                                                                                                                                                                                                                                                                                                                              |
|                                                                                                                                                                                                                                                                                                                                                                                                                                                                                        | LINE NUMBER                                                                                                                                                                                                                                     | 01                                                                                                                                                                                                                                                                                                                                                                                                                                                                       | 02 | 03                                                                                                                                                                                                                                              | 04              | 05                                                                                                                                                                                                                                                                                                                                                                                                                                                                                                                                 |
| 203                                                                                                                                                                                                                                                                                                                                                                                                                                                                                    | Now I would like to ask you one by one about all methods you are <b>using now</b> .<br>[RECORD ALL METHODS BEING USED NOW, ONE METHOD PER ONE COLUMN NUMBER.<br>IF THERE ARE MORE THAN 5 METHODS, USE ADDITIONAL QUESTIONNAIRE.]<br>(show card) |                                                                                                                                                                                                                                                                                                                                                                                                                                                                          |    |                                                                                                                                                                                                                                                 |                 | ->204                                                                                                                                                                                                                                                                                                                                                                                                                                                                                                                              |
| 204                                                                                                                                                                                                                                                                                                                                                                                                                                                                                    | What was your source of information about the method when you first started using it?                                                                                                                                                           |                                                                                                                                                                                                                                                                                                                                                                                                                                                                          |    |                                                                                                                                                                                                                                                 |                 | ->205                                                                                                                                                                                                                                                                                                                                                                                                                                                                                                                              |
| 205                                                                                                                                                                                                                                                                                                                                                                                                                                                                                    | Where did you obtain that method when you first started using it?                                                                                                                                                                               |                                                                                                                                                                                                                                                                                                                                                                                                                                                                          |    |                                                                                                                                                                                                                                                 |                 | 1-13->206<br>14-99->207                                                                                                                                                                                                                                                                                                                                                                                                                                                                                                            |
| 206                                                                                                                                                                                                                                                                                                                                                                                                                                                                                    | What was the purpose of your going to the health facility on the day you first received the contraceptive method?                                                                                                                               |                                                                                                                                                                                                                                                                                                                                                                                                                                                                          |    |                                                                                                                                                                                                                                                 |                 | Repeat until all methods were explained.<br>Then ->207                                                                                                                                                                                                                                                                                                                                                                                                                                                                             |
| <b>Code: 202, 203</b><br>1. Female sterilization<br>2. Male sterilization<br>3. IUD<br>4. Injectable (e.g., DMPA)<br>5. Implants<br>6. Patch<br>7. Pill<br>8. Male Condom<br>9. Female condom<br>10. Diaphragm<br>11. Foam/Jelly/Cream<br>12. Mucus/Billings/Ovulation<br>13. Basal body temperature<br>14. Symptothermal<br>15. Standard days method<br>16. LAM<br>17. Calendar/Rhythm/Periodic abstinence<br>18. Withdrawal<br>19. Herbal<br>20. Other modern method (specify) _____ |                                                                                                                                                                                                                                                 | <b>Code: 204, 205</b><br><b>Public Sector</b><br>1. Government hospital<br>2. Rural health unit/Urban health center/ Barangay health center<br>3. Barangay health station<br>4. Barangay supply/Service point office/BHW<br>5. Other public (specify) _____<br><b>Private medical sector</b><br>6. Private hospital/clinic<br>7. Pharmacy<br>8. Private doctor<br>9. Private nurse, midwife<br>10. NGO<br>11. Industry-based clinic<br>12. Other private (specify) _____ |    | <b>Other sources</b><br>13. Puericulture center<br>14. Store<br>15. Church<br>16. Friends/Relatives<br>17. Internet<br>18. Advertisement/T.V<br>19. School<br>20. Quack doctor<br>21. Own self<br>22. Husband/Partner<br>23. Seminar in company |                 | <b>Code 206</b><br>1. Prenatal care<br>2. Giving birth, while a woman is still in the facility<br>3. Reproductive health outpatient clinic for postnatal care<br>4. Reproductive health clinic not related to postnatal care<br>5. Receiving vaccination or routine check- up for child<br>6. Seeking medical advice or treatment for sickness or injury of child<br>7. Seeking medical advice or treatment for sickness or injury of herself<br>8. Adolescent clinic<br>9. Get contraceptive<br>10. Seminar<br>99. Not Applicable |

RESPONDENT NUMBER:

|        |          |           |      |              |                |
|--------|----------|-----------|------|--------------|----------------|
| Region | Province | City/ Mun | Brgy | Facility no. | Respondent No. |
|--------|----------|-----------|------|--------------|----------------|

|                                                                                                                                                                                                                                                                                                                                                                                                                                                               |                                                                                                                                                                                                                                                                                                                                                                                         |                                                                                                                                                                                                                                                                                                                                                                                                                                                                             |    |    |                                                                                                                                                                                                                                                                                                                                                                                                                                                                                                                                    |                 |  |                   |                         |
|---------------------------------------------------------------------------------------------------------------------------------------------------------------------------------------------------------------------------------------------------------------------------------------------------------------------------------------------------------------------------------------------------------------------------------------------------------------|-----------------------------------------------------------------------------------------------------------------------------------------------------------------------------------------------------------------------------------------------------------------------------------------------------------------------------------------------------------------------------------------|-----------------------------------------------------------------------------------------------------------------------------------------------------------------------------------------------------------------------------------------------------------------------------------------------------------------------------------------------------------------------------------------------------------------------------------------------------------------------------|----|----|------------------------------------------------------------------------------------------------------------------------------------------------------------------------------------------------------------------------------------------------------------------------------------------------------------------------------------------------------------------------------------------------------------------------------------------------------------------------------------------------------------------------------------|-----------------|--|-------------------|-------------------------|
| 207                                                                                                                                                                                                                                                                                                                                                                                                                                                           | If you <b>are not</b> using any method to delay or avoid getting pregnant now, have you or your sexual partner done something or used a method to delay or avoid getting pregnant in the past?<br>If <b>you are</b> using a method to delay or avoid getting pregnant now, have you or your sexual partner ever used a different method to delay or avoid getting pregnant in the past? |                                                                                                                                                                                                                                                                                                                                                                                                                                                                             |    |    |                                                                                                                                                                                                                                                                                                                                                                                                                                                                                                                                    | 1. Yes<br>2. No |  | 1->208<br>2-> 301 |                         |
| 208                                                                                                                                                                                                                                                                                                                                                                                                                                                           | Which methods have you used in the past? <b>([WRITE DOWN ALL MENTIONED.]</b>                                                                                                                                                                                                                                                                                                            |                                                                                                                                                                                                                                                                                                                                                                                                                                                                             |    |    |                                                                                                                                                                                                                                                                                                                                                                                                                                                                                                                                    |                 |  |                   | -> 209                  |
|                                                                                                                                                                                                                                                                                                                                                                                                                                                               | LINE NUMBER                                                                                                                                                                                                                                                                                                                                                                             | 01                                                                                                                                                                                                                                                                                                                                                                                                                                                                          | 02 | 03 | 04                                                                                                                                                                                                                                                                                                                                                                                                                                                                                                                                 | 05              |  |                   |                         |
| 209                                                                                                                                                                                                                                                                                                                                                                                                                                                           | Now I would like to ask you one by one about all methods you have used in the past.<br><b>[RECORD ALL METHODS, ONE METHOD PER ONE COLUMN NUMBER AT THE RIGHT.<br/>IF THERE ARE MORE THAN 5 METHODS, USE ADDITIONAL QUESTIONNAIRE.]</b>                                                                                                                                                  |                                                                                                                                                                                                                                                                                                                                                                                                                                                                             |    |    |                                                                                                                                                                                                                                                                                                                                                                                                                                                                                                                                    |                 |  |                   | -> 210                  |
| 210                                                                                                                                                                                                                                                                                                                                                                                                                                                           | What was the source of information of the method when you first started using it?                                                                                                                                                                                                                                                                                                       |                                                                                                                                                                                                                                                                                                                                                                                                                                                                             |    |    |                                                                                                                                                                                                                                                                                                                                                                                                                                                                                                                                    |                 |  |                   | -> 211                  |
| 211                                                                                                                                                                                                                                                                                                                                                                                                                                                           | Where did you obtain the family planning method when you first started using it?                                                                                                                                                                                                                                                                                                        |                                                                                                                                                                                                                                                                                                                                                                                                                                                                             |    |    |                                                                                                                                                                                                                                                                                                                                                                                                                                                                                                                                    |                 |  |                   | 1-13->212<br>14-99->213 |
| 212                                                                                                                                                                                                                                                                                                                                                                                                                                                           | Why did you visit the health facility where you first started using the family planning method?                                                                                                                                                                                                                                                                                         |                                                                                                                                                                                                                                                                                                                                                                                                                                                                             |    |    |                                                                                                                                                                                                                                                                                                                                                                                                                                                                                                                                    |                 |  |                   | -> 213                  |
| 213                                                                                                                                                                                                                                                                                                                                                                                                                                                           | Why did you stop using the family planning method that you used in the past?                                                                                                                                                                                                                                                                                                            |                                                                                                                                                                                                                                                                                                                                                                                                                                                                             |    |    |                                                                                                                                                                                                                                                                                                                                                                                                                                                                                                                                    |                 |  |                   | -> 301                  |
| <b>Code: 208, 209</b>                                                                                                                                                                                                                                                                                                                                                                                                                                         |                                                                                                                                                                                                                                                                                                                                                                                         | <b>Code: 210, 211</b><br><b>Public Sector</b><br>1. Government hospital<br>2. Rural health unit/Urban health center/<br>Barangay health center<br>3. Barangay health station<br>4. Barangay supply/Service point office/BHW<br>5. Other public (specify) _____<br><b>Private medical sector</b><br>6. Private hospital/clinic<br>7. Pharmacy<br>8. Private doctor<br>9. Private nurse, midwife<br>10. NGO<br>11. Industry-based clinic<br>12. Other private (specify) _____ |    |    | <b>Code 212</b><br>1. Prenatal care<br>2. Giving birth, while a woman is still in the facility<br>3. Reproductive health outpatient clinic for postnatal care<br>4. Reproductive health clinic not related to postnatal care<br>5. Receiving vaccination or routine check- up for child<br>6. Seeking medical advice or treatment for sickness or injury of child<br>7. Seeking medical advice or treatment for sickness or injury of herself<br>8. Adolescent clinic<br>9. Get contraceptive<br>10. Seminar<br>99. Not Applicable |                 |  |                   |                         |
| 1. Female sterilization<br>2. Male sterilization<br>3. IUD<br>4. Injectable (e.g., DMPA)<br>5. Implants<br>6. Patch<br>7. Pill<br>8. Male Condom<br>9. Female condom<br>10. Diaphragm<br>11. Foam/Jelly/Cream<br>12. Mucus/Billings/Ovulation<br>13. Basal body temperature<br>14. Symptothermal<br>15. Standard days method<br>16. LAM<br>17. Calendar/Rhythm/Periodic abstinence<br>18. Withdrawal<br>19. Herbal<br>20. Other modern method (specify) _____ |                                                                                                                                                                                                                                                                                                                                                                                         | 13. Puericulture center<br>14. Store<br>15. Church<br>16. Friends/Relatives<br>17. Internet<br>18. Advertisement/T.V<br>19. School<br>20. Quack Doctor<br>21. Self/Own<br>22. Husband/Partner<br>23. Seminar in Company<br>99-Not Applicable<br><b>(APPLIES TO Q. 211 ONLY)</b>                                                                                                                                                                                             |    |    | 16. Afraid to get pregnant<br>17. Expired LAM Period<br>18. Already old to get pregnant<br>19. Removed accidentally<br>20. Just decided                                                                                                                                                                                                                                                                                                                                                                                            |                 |  |                   |                         |
| <b>Code: 213</b>                                                                                                                                                                                                                                                                                                                                                                                                                                              |                                                                                                                                                                                                                                                                                                                                                                                         | 8. Husband/partner did not support or allow to use<br>9. Wanted to get pregnant<br>10. Got pregnant<br>11. Switched to other method<br>12. Partner working away from home                                                                                                                                                                                                                                                                                                   |    |    |                                                                                                                                                                                                                                                                                                                                                                                                                                                                                                                                    |                 |  |                   |                         |

RESPONDENT NUMBER:

|        |          |           |      |              |                |
|--------|----------|-----------|------|--------------|----------------|
| Region | Province | City/ Mun | Brgy | Facility no. | Respondent No. |
|--------|----------|-----------|------|--------------|----------------|

|                                                                |                                                                                                                                                                                                                                                                                                                                                                                                                                                                                                                                                                                                                                                                                                                                                                                                                                                                                                                                                                                                                                                                                                                                                                                                                                                                                                                                                                                                                                                                                                                                                                         |                               |           |           |           |           |                    |
|----------------------------------------------------------------|-------------------------------------------------------------------------------------------------------------------------------------------------------------------------------------------------------------------------------------------------------------------------------------------------------------------------------------------------------------------------------------------------------------------------------------------------------------------------------------------------------------------------------------------------------------------------------------------------------------------------------------------------------------------------------------------------------------------------------------------------------------------------------------------------------------------------------------------------------------------------------------------------------------------------------------------------------------------------------------------------------------------------------------------------------------------------------------------------------------------------------------------------------------------------------------------------------------------------------------------------------------------------------------------------------------------------------------------------------------------------------------------------------------------------------------------------------------------------------------------------------------------------------------------------------------------------|-------------------------------|-----------|-----------|-----------|-----------|--------------------|
| 5. Health worker did not continue to provide the method.       | 13. Did not like the method                                                                                                                                                                                                                                                                                                                                                                                                                                                                                                                                                                                                                                                                                                                                                                                                                                                                                                                                                                                                                                                                                                                                                                                                                                                                                                                                                                                                                                                                                                                                             | 21. Concerns for side effects |           |           |           |           |                    |
| 6. Quality of care provided by the health facility or provider | 14. Forgot to take Regularly                                                                                                                                                                                                                                                                                                                                                                                                                                                                                                                                                                                                                                                                                                                                                                                                                                                                                                                                                                                                                                                                                                                                                                                                                                                                                                                                                                                                                                                                                                                                            |                               |           |           |           |           |                    |
| 7. Advice of friends, relatives, neighbors                     | 15. Advice of Health Staff                                                                                                                                                                                                                                                                                                                                                                                                                                                                                                                                                                                                                                                                                                                                                                                                                                                                                                                                                                                                                                                                                                                                                                                                                                                                                                                                                                                                                                                                                                                                              |                               |           |           |           |           |                    |
| <b>Section 3. FP Concerns and Today's FP counseling</b>        |                                                                                                                                                                                                                                                                                                                                                                                                                                                                                                                                                                                                                                                                                                                                                                                                                                                                                                                                                                                                                                                                                                                                                                                                                                                                                                                                                                                                                                                                                                                                                                         |                               |           |           |           |           |                    |
| 301                                                            | Do you have any concerns about any type of family planning method?                                                                                                                                                                                                                                                                                                                                                                                                                                                                                                                                                                                                                                                                                                                                                                                                                                                                                                                                                                                                                                                                                                                                                                                                                                                                                                                                                                                                                                                                                                      | 1. Yes<br>2. No               |           |           |           |           | 1 ->302<br>2 ->305 |
|                                                                | <b>LINE NUMBER</b>                                                                                                                                                                                                                                                                                                                                                                                                                                                                                                                                                                                                                                                                                                                                                                                                                                                                                                                                                                                                                                                                                                                                                                                                                                                                                                                                                                                                                                                                                                                                                      | <b>01</b>                     | <b>02</b> | <b>03</b> | <b>04</b> | <b>05</b> | <b>06</b>          |
| 302                                                            | About which family planning methods do you have concerns?<br><br><b>[WRITE ONE METHOD PER CELL. IF THERE ARE MORE THAN 6 METHODS WITH CONCERN, USE ANOTHER questionnaire]</b><br><br><div> <div>1. Female sterilization</div> <div>2. Male sterilization</div> <div>3. IUD</div> <div>4. Injectable</div> <div>5. Implants</div> <div>6. Patch</div> <div>7. Pill</div> <div>8. Condom</div> <div>9. Calendar/Rhythm/Period</div> <div>10. Withdrawal</div> </div>                                                                                                                                                                                                                                                                                                                                                                                                                                                                                                                                                                                                                                                                                                                                                                                                                                                                                                                                                                                                                                                                                                      |                               |           |           |           |           | -> 303             |
| 303                                                            | What are your concerns about that family planning method?<br><br><b>[USE ONE LINE NUMBER FOR ONE METHOD. WRITE DOWN ALL MENTIONED CONCERNS PER EACH METHOD. ]</b>                                                                                                                                                                                                                                                                                                                                                                                                                                                                                                                                                                                                                                                                                                                                                                                                                                                                                                                                                                                                                                                                                                                                                                                                                                                                                                                                                                                                       |                               |           |           |           |           | -> 304             |
|                                                                | <div> <div>1. Cause cancer in the uterus</div> <div>2. Cause cysts in the uterus</div> <div>3. Cause infection of the uterus</div> <div>4. Cause frequent bleeding</div> <div>5. Cause thyroid problems</div> <div>6. Cause/worsen asthma</div> <div>7. Cause/worsen lots of veins</div> <div>8. Cause dry skin, skin disease</div> <div>9. Cause weight</div> <div>10. Cause weight loss</div> <div>11. Cause bloated stomach</div> <div>12. Cause headache</div> <div>13. Cause irritability</div> <div>14. Increase libido/turn into a maniac</div> <div>IUD/Implants</div> <div>22. Melt or move around inside the body and doctors will not be able to find.</div> <div>23. Washed away/pushed out of body.</div> <div>24. Painful to insert</div> <div>IUD</div> <div>25. Itchy on the vagina.</div> <div>26. Entangled around the man's penis</div> <div>27. Messy when inserted</div> <div>Male Sterilization</div> <div>28. Part of the man's testicles are cut off</div> <div>29. It hurts the testicles</div> <div>39. Cause of Death</div> <div>40. Dizziness/vomiting</div> <div>41. Easily forget to take</div> <div>42. Cause hearing problem</div> <div>43. Cause memory loss</div> <div>44. Side effects</div> <div>45. Cause liver disease</div> <div>46. Cause kidney disease</div> <div>47. Injection is painful</div> <div>48. Painful during intercourse</div> <div>49. Afraid of operation (tubal ligation)</div> <div>50. Cannot carry heavy things</div> <div>51. Pills remain in the body</div> <div>52. Cannot do normal things</div> </div> |                               |           |           |           |           |                    |

RESPONDENT NUMBER:

|        |          |           |      |              |                |
|--------|----------|-----------|------|--------------|----------------|
| Region | Province | City/ Mun | Brgy | Facility no. | Respondent No. |
|--------|----------|-----------|------|--------------|----------------|

|     |                                                                                                                                                                                                                                                                                                                                                                                                                                                             |                                                                                                                                                                                                                                                                                                               |                                                                                                                                                                                                                                                               |    |    |    |    |    |        |
|-----|-------------------------------------------------------------------------------------------------------------------------------------------------------------------------------------------------------------------------------------------------------------------------------------------------------------------------------------------------------------------------------------------------------------------------------------------------------------|---------------------------------------------------------------------------------------------------------------------------------------------------------------------------------------------------------------------------------------------------------------------------------------------------------------|---------------------------------------------------------------------------------------------------------------------------------------------------------------------------------------------------------------------------------------------------------------|----|----|----|----|----|--------|
|     | 15. Cause loss/reduce of libido<br>16. Cause loss/reduce of sexual satisfaction<br>17. One will not have children anymore<br>18. Not fully effective, woman could still get pregnant<br>19. When it does not work, the baby is born with abnormalities<br>20. Results in mortal sin because it is against church teachings<br>21. It is not legally allowed to use                                                                                          | 30. The man loses his manhood ( <i>pagkalalaki</i> )<br>31. Delayed menstruation<br>32. Cause Heart Problem<br>33. Painful during menstruation<br>34. Do not like pap smear while taking pills<br>35. Cause hypertension<br>36. Cause hypotension<br>37. Cause Myoma<br>38. Delayed Menstruation due to Myoma | 53. Quality control of the commodity<br>54. Cause cramps<br>55. Cause Edema<br>56. Cause pain in the hips<br>57. IUD doesn't fit<br>58. Cause for losing consciousness<br>59. Cause bad effect in breastfeeding<br>60. Cause of poor eyesight<br>61. Diarrhea |    |    |    |    |    |        |
|     | LINE NUMBER                                                                                                                                                                                                                                                                                                                                                                                                                                                 |                                                                                                                                                                                                                                                                                                               | 01                                                                                                                                                                                                                                                            | 02 | 03 | 04 | 05 | 06 |        |
| 304 | Who told you or how did you find about your concerns about family planning methods?<br><br><b>[REPEAT EACH CONCERN IN TURN. FOR EACH WRITE DOWN ALL SOURCES OF INFORMATION.]</b><br><br>1. Health staff<br>2. BHW or health volunteers<br>3. Husband or partner did not want to use<br>4. Friend, neighbours, relatives<br>5. Church<br>6. Radio<br>7. Television<br>8. Newspaper or magazine<br>9. Online or internet<br>10. Own experience<br>11. Seminar |                                                                                                                                                                                                                                                                                                               |                                                                                                                                                                                                                                                               |    |    |    |    |    | -> 305 |

**[IF THE WOMAN HAS NOT HAD THE CONSULTATION GO TO SECTION 4 AND ASK QUESTIONS 305-321 AFTER THE CONSULTATION.]**

RESPONDENT NUMBER:

|        |          |          |      |         |                |
|--------|----------|----------|------|---------|----------------|
|        |          |          |      |         |                |
| Region | Province | City/Mun | Brgy | Fac. No | Respondent No. |

|     |                                                                                                                     |                                                                                                                                                                                                                                                                                                                                                                                                                                                               |  |                                |
|-----|---------------------------------------------------------------------------------------------------------------------|---------------------------------------------------------------------------------------------------------------------------------------------------------------------------------------------------------------------------------------------------------------------------------------------------------------------------------------------------------------------------------------------------------------------------------------------------------------|--|--------------------------------|
| 305 | Today, did any staff member at the health facility speak to you about family planning methods?                      | 1. Yes<br>2. No                                                                                                                                                                                                                                                                                                                                                                                                                                               |  | 1 ->306<br>2 ->317             |
| 306 | Did the health staff ask you about your concerns on family planning?                                                | 1. Yes<br>2. No                                                                                                                                                                                                                                                                                                                                                                                                                                               |  | 1 ->307<br>2 ->317             |
| 307 | Do you feel the health staff understands your concerns?                                                             | 1. Yes<br>2. No                                                                                                                                                                                                                                                                                                                                                                                                                                               |  | -> 308                         |
| 308 | Did the health staff help you to find solutions to your concerns?                                                   | 1. Yes<br>2. No                                                                                                                                                                                                                                                                                                                                                                                                                                               |  | -> 309                         |
| 309 | Did the health staff offer you information how different family planning methods work?                              | 1. Yes<br>2. No                                                                                                                                                                                                                                                                                                                                                                                                                                               |  | 1 ->310<br>2 ->312             |
| 310 | Which methods did the health staff mention today?<br>[WRITE DOWN ALL MENTIONED SEPARATED BY COMMA.]                 | 1. Female sterilization<br>2. Male sterilization<br>3. IUD<br>4. Injectable (e.g., DMPA)<br>5. Implants<br>6. Patch<br>7. Pill<br>8. Male Condom<br>9. Female condom<br>10. Diaphragm<br>11. Foam/Jelly/Cream<br>12. Mucus/Billings/Ovulation<br>13. Basal body temperature<br>14. Symptothermal<br>15. Standard days method<br>16. LAM<br>17. Calendar/Rhythm/Periodic abstinence<br>18. Withdrawal<br>19. Herbal<br>20. Other modern method (specify) _____ |  | -> 311                         |
| 311 | Did the health staff tell you about side-effects or problems you might have with any methods of family planning?    | 1. Yes<br>2. No                                                                                                                                                                                                                                                                                                                                                                                                                                               |  | -> 312                         |
| 312 | Did the health worker offer you information how <b>your family planning method</b> (which you are now using) works? | 1. Yes<br>2. No<br>99. N/A (not using a method now)                                                                                                                                                                                                                                                                                                                                                                                                           |  | 1 -> 313<br>2-> 313<br>3-> 315 |
| 313 | Did the health staff explain about the side effects of your current method?                                         | 1. Yes<br>2. No                                                                                                                                                                                                                                                                                                                                                                                                                                               |  | -> 314                         |
| 314 | Did the health staff ask you to describe how you use your current method?                                           | 1. Yes<br>2. No                                                                                                                                                                                                                                                                                                                                                                                                                                               |  | -> 317                         |
| 315 | After receiving FP counselling will you begin using a family planning method today?                                 | 1. Yes<br>2. No                                                                                                                                                                                                                                                                                                                                                                                                                                               |  | 1 -> 317<br>2 -> 316           |
| 316 | After receiving FP counselling, do you think you will use a contraceptive method anytime in the future?             | 1. Yes<br>2. No                                                                                                                                                                                                                                                                                                                                                                                                                                               |  | 1 -> 317<br>2 -> 321           |



RESPONDENT NUMBER:

|        |          |           |      |              |                |
|--------|----------|-----------|------|--------------|----------------|
|        |          |           |      |              |                |
| Region | Province | City/ Mun | Brgy | Facility no. | Respondent No. |

|     |                                                                                      |                                                                                                                                                                                                                                                                                                                                                                                                                                                                                                                                                                                                                                                     |  |                       |
|-----|--------------------------------------------------------------------------------------|-----------------------------------------------------------------------------------------------------------------------------------------------------------------------------------------------------------------------------------------------------------------------------------------------------------------------------------------------------------------------------------------------------------------------------------------------------------------------------------------------------------------------------------------------------------------------------------------------------------------------------------------------------|--|-----------------------|
| 317 | Which contraceptive method would you prefer most to use?<br><b>(ONE METHOD ONLY)</b> | <ol style="list-style-type: none"> <li>None</li> <li>Female sterilization</li> <li>Male sterilization</li> <li>IUD</li> <li>Injectable (e.g., DMPA)</li> <li>Implants</li> <li>Patch</li> <li>Pill</li> <li>Male Condom</li> <li>Female condom</li> <li>Diaphragm</li> <li>Foam/Jelly/Cream</li> <li>Mucus/Billings/Ovulation</li> <li>Basal body temperature</li> <li>Symptothermal</li> <li>Standard days method</li> <li>LAM</li> <li>Calendar/Rhythm/Periodic abstinence</li> <li>Withdrawal</li> <li>Herbal</li> <li>Other modern method (specify) ____</li> </ol>                                                                             |  | 1-> 321<br>2-21-> 318 |
| 318 | Why do you prefer the method?                                                        | <ol style="list-style-type: none"> <li>Free</li> <li>Always available</li> <li>No side effects</li> <li>Easy to use</li> <li>Recommended by health staff</li> <li>Recommended by friends, neighbours, relatives</li> <li>Lifetime effectivity</li> <li>3 months effectivity</li> <li>3 years effectivity</li> <li>10 years effectivity</li> <li>100% effective for this person</li> <li>Affordable price</li> <li>Improves communication/understanding with husband</li> <li>6 months (LAM)</li> <li>No side effects for her</li> <li>Happy to gain weight</li> <li>stops menstruation (less hassle)</li> <li>Regularity of menstruation</li> </ol> |  | 1-2-> 401<br>3-7->319 |
| 319 | Will you use the method?                                                             | <ol style="list-style-type: none"> <li>Yes</li> <li>No</li> </ol>                                                                                                                                                                                                                                                                                                                                                                                                                                                                                                                                                                                   |  | 1->401<br>2->320      |
| 320 | Why do you think you will not use your preferred method?                             | <ol style="list-style-type: none"> <li>Perceived to be expensive</li> <li>No idea where and how to avail</li> <li>Advised by the doctor not to use due to _____</li> <li>Ligated</li> <li>Side effects</li> <li>Gain Weight</li> <li>Husband disagrees</li> <li>No menstruation yet</li> <li>Sexually inactive</li> <li>Painful</li> <li>Undecided</li> </ol>                                                                                                                                                                                                                                                                                       |  | -> 401                |

RESPONDENT NUMBER:

|        |          |           |      |              |                |
|--------|----------|-----------|------|--------------|----------------|
|        |          |           |      |              |                |
| Region | Province | City/ Mun | Brgy | Facility no. | Respondent No. |

|     |                                                                                  |                                                                                                                                                                                                                                                                                                               |  |        |
|-----|----------------------------------------------------------------------------------|---------------------------------------------------------------------------------------------------------------------------------------------------------------------------------------------------------------------------------------------------------------------------------------------------------------|--|--------|
| 321 | Why do you think you will not use any contraceptive method anytime in the future | 1. Afraid of side effects<br>2. Already old to get pregnant<br>3. Not supported by husband<br>4. No need<br>5. hard to get pregnant<br>6. Not enough information<br>7. Against religion<br>8. Want to get pregnant<br>9. No reason<br>10. Hard to use<br>11. Not legally use<br>12. Not yet thinking about it |  | -> 401 |
|-----|----------------------------------------------------------------------------------|---------------------------------------------------------------------------------------------------------------------------------------------------------------------------------------------------------------------------------------------------------------------------------------------------------------|--|--------|

| Section 4. Past Health Facility visit and FP Counseling |                                                                                                                               |                 |  |                                          |
|---------------------------------------------------------|-------------------------------------------------------------------------------------------------------------------------------|-----------------|--|------------------------------------------|
| 401                                                     | From January 1- December 31, 2016, have you visited a health facility for care for yourself or your children for any purpose? | 1. Yes<br>2. No |  | 1 -> 402<br>2 -> <b>END OF INTERVIEW</b> |

RESPONDENT NUMBER:

|        |          |          |      |         |                |
|--------|----------|----------|------|---------|----------------|
| Region | Province | City/Mun | Brgy | Fac. No | Respondent No. |
|--------|----------|----------|------|---------|----------------|

|     | LINE NUMBER                                                                                                                                                                                                                                                                                                                                                                                                                                                                                          | 01 | 02 | 03 | 04 | 05 | 06 |                      |
|-----|------------------------------------------------------------------------------------------------------------------------------------------------------------------------------------------------------------------------------------------------------------------------------------------------------------------------------------------------------------------------------------------------------------------------------------------------------------------------------------------------------|----|----|----|----|----|----|----------------------|
| 402 | Now I would like to record all your facility visits from January 1 – December 31, 2016. Start with the latest visit you had. Why did you visit a health facility?<br>[AFTER WRITING THE FIRST VISIT IN LINE NUMBER 01, ASK Q403-410 FOR THAT VISIT. THEN ASK THE 2 <sup>nd</sup> LATEST VISIT TO WRITE IN 402 LINE NUMBER 02, THEN ASK Q 403 AND Q404.<br>REPEAT FOR ALL HEALTH FACILITY VISITS FROM JANUARY 1 - DECEMBER 31, 2016.]<br>[IF THERE ARE MORE THAN 6, USE AN ADDITIONAL QUESTIONNAIRE.] |    |    |    |    |    |    | -> 403               |
| 403 | Where did you visit?                                                                                                                                                                                                                                                                                                                                                                                                                                                                                 |    |    |    |    |    |    | -> 404               |
| 404 | At that visit, were you or your sexual partner already using any method to delay or avoid getting pregnant? 1=Yes 2=No                                                                                                                                                                                                                                                                                                                                                                               |    |    |    |    |    |    | 1 -> 405<br>2 -> 406 |
| 405 | Which method(s) were you using?<br>[WRITE DOWN ALL MENTIONED.]                                                                                                                                                                                                                                                                                                                                                                                                                                       |    |    |    |    |    |    | ->406                |

|                                                                                                                                                                                                                                                                                                                                                                                                                                                                                                                                                                                       |                                                                                                                                                                                                                                                                                                                                                                                                                                                                    |                                                                                                                                                                                                                                                                      |                                                                                                                                                                                                                                                                                                                                                                                                                                                                                   |
|---------------------------------------------------------------------------------------------------------------------------------------------------------------------------------------------------------------------------------------------------------------------------------------------------------------------------------------------------------------------------------------------------------------------------------------------------------------------------------------------------------------------------------------------------------------------------------------|--------------------------------------------------------------------------------------------------------------------------------------------------------------------------------------------------------------------------------------------------------------------------------------------------------------------------------------------------------------------------------------------------------------------------------------------------------------------|----------------------------------------------------------------------------------------------------------------------------------------------------------------------------------------------------------------------------------------------------------------------|-----------------------------------------------------------------------------------------------------------------------------------------------------------------------------------------------------------------------------------------------------------------------------------------------------------------------------------------------------------------------------------------------------------------------------------------------------------------------------------|
| <b>Code 402</b><br>1. Prenatal care<br>2. Giving birth, while a woman is still in the facility<br>3. Reproductive health outpatient clinic for postnatal care<br>4. Reproductive health clinic not related to postnatal care<br>5. Receiving vaccination or routine check-up for child<br>6. Seeking medical advice or treatment for sickness or injury of child<br>7. Seeking medical advice or treatment for sickness or injury of herself<br>8. Adolescent clinic<br>9. Get contraceptive<br>10. Seeking medical advice or treatment for sickness of husband<br>99. Not Applicable | <b>Code: 403</b><br><b>Public Sector</b><br>1. Government hospital<br>2. Rural health unit/Urban health center/Barangay health center<br>3. Barangay health station<br>4. Barangay supply/Service point office/BHW<br>5. Other public (specify) _____<br><b>Private medical sector</b><br>6. Private hospital/clinic<br>7. Pharmacy<br>8. Private doctor<br>9. Private nurse, midwife<br>10. NGO<br>11. Industry-based clinic<br>12. Other private (specify) _____ | <b>Other sources</b><br>13. Puericulture center<br>14. Store<br>15. Church<br>16. Friends/Relatives<br>17. Internet<br>18. Advertisement/T.V<br>19. School<br>20. Quack Doctor<br>21. Self/Own<br>22. Husband/Partner<br>23. Seminar in Company<br>99-Not Applicable | <b>Code: 405</b><br>1. Female sterilization<br>2. Male sterilization<br>3. IUD<br>4. Injectable (e.g., DMPA)<br>5. Implants<br>6. Patch<br>7. Pill<br>8. Male Condom<br>9. Female condom<br>10. Diaphragm<br>11. Foam/Jelly/Cream<br>12. Mucus/Billings/Ovulation<br>13. Basal body temperature<br>14. Symptothermal<br>15. Standard days method<br>16. LAM<br>17. Calendar/Rhythm/Periodic abstinence<br>18. Withdrawal<br>19. Herbal<br>20. Other modern method (specify) _____ |
|---------------------------------------------------------------------------------------------------------------------------------------------------------------------------------------------------------------------------------------------------------------------------------------------------------------------------------------------------------------------------------------------------------------------------------------------------------------------------------------------------------------------------------------------------------------------------------------|--------------------------------------------------------------------------------------------------------------------------------------------------------------------------------------------------------------------------------------------------------------------------------------------------------------------------------------------------------------------------------------------------------------------------------------------------------------------|----------------------------------------------------------------------------------------------------------------------------------------------------------------------------------------------------------------------------------------------------------------------|-----------------------------------------------------------------------------------------------------------------------------------------------------------------------------------------------------------------------------------------------------------------------------------------------------------------------------------------------------------------------------------------------------------------------------------------------------------------------------------|

RESPONDENT NUMBER:

|        |          |           |      |              |                |
|--------|----------|-----------|------|--------------|----------------|
| Region | Province | City/ Mun | Brgy | Facility no. | Respondent No. |
|--------|----------|-----------|------|--------------|----------------|

|     | LINE NUMBER                                                                                                                                                                                                                                                                                                                                                                                                                                                                                                                                                                                                          | 01                                                                                                                                                                                                                                                                      | 02 | 03 | 04 | 05 | 06 |                                       |
|-----|----------------------------------------------------------------------------------------------------------------------------------------------------------------------------------------------------------------------------------------------------------------------------------------------------------------------------------------------------------------------------------------------------------------------------------------------------------------------------------------------------------------------------------------------------------------------------------------------------------------------|-------------------------------------------------------------------------------------------------------------------------------------------------------------------------------------------------------------------------------------------------------------------------|----|----|----|----|----|---------------------------------------|
| 406 | At that visit, did any staff member at the health facility speak to you about family planning methods? 1-Yes 2-No                                                                                                                                                                                                                                                                                                                                                                                                                                                                                                    |                                                                                                                                                                                                                                                                         |    |    |    |    |    | 1-> 407<br>2-> 402 next column number |
| 407 | After that visit, did you start using any FP method or change from your previous method to a new method? 1=Yes 2=No                                                                                                                                                                                                                                                                                                                                                                                                                                                                                                  |                                                                                                                                                                                                                                                                         |    |    |    |    |    | 1 -> 409<br>2 -> 408                  |
| 408 | If you did not start a new method or change from your previous method, why?<br>1. No need<br>2. Possible side effects of new method<br>3. New method not available at the facility<br>4. Concerns about risk of pregnancy with new method<br>5. Not enough information<br>6. Could not afford to purchase<br>7. Advice of friends, relatives, neighbors not to start or change<br>8. Husband/partner did not support<br>9. No menstruation yet/Lactational Amenorrhea (LA)<br>10. Pregnant at that time<br>11. Advice by BHW not to use due to old age<br>12. Wants another baby<br>13. I am too old<br>14. Religion |                                                                                                                                                                                                                                                                         |    |    |    |    |    |                                       |
| 409 | Which FP method did you start using after that visit or which new method did you change to?                                                                                                                                                                                                                                                                                                                                                                                                                                                                                                                          |                                                                                                                                                                                                                                                                         |    |    |    |    |    | -> 402 next column number             |
|     | 1. Female sterilization<br>2. Male sterilization<br>3. IUD<br>4. Injectable (e.g., DMPA)<br>5. Implants<br>6. Patch<br>7. Pill<br>8. Male Condom<br>9. Female condom<br>10. Diaphragm                                                                                                                                                                                                                                                                                                                                                                                                                                | 11. Foam/Jelly/Cream<br>12. Mucus/Billings/Ovulation<br>13. Basal body temperature<br>14. Symptothermal<br>15. Standard days method<br>16. LAM<br>17. Calendar/Rhythm/Periodic abstinence<br>18. Withdrawal<br>19. Herbal<br>20. Other modern method (specify)<br>_____ |    |    |    |    |    |                                       |

END OF THE INTERVIEW
