# Supplementary material for: Opportunities lost: Barriers to increasing the use of effective contraception in the Philippines
Source: PLOS journal article supplement (doi:10.1371/journal.pone.0218187), 2019-07-25
Supplement: S10 (10.1371/journal.pone.0218187.s010) [file journal.pone.0218187.s010]

FACILITY NUMBER:

|        |          |          |      |    |
|--------|----------|----------|------|----|
|        |          |          |      |    |
| Region | Province | City/Mun | Brgy | No |

As of April 14, 2017

## FORM2. Assessments of Facility Availability of Family Planning Commodities and Hospital Accreditation Status

[Fill one number for each health facility where the interview of the woman was conducted.]

|                                                                                                                                                                                                                                                                                                                |          |           |
|----------------------------------------------------------------------------------------------------------------------------------------------------------------------------------------------------------------------------------------------------------------------------------------------------------------|----------|-----------|
| Identification of the Health Facility                                                                                                                                                                                                                                                                          |          |           |
| Region                                                                                                                                                                                                                                                                                                         |          |           |
| Province                                                                                                                                                                                                                                                                                                       |          |           |
| City/Municipality                                                                                                                                                                                                                                                                                              |          |           |
| Health facility name                                                                                                                                                                                                                                                                                           |          |           |
| Barangay                                                                                                                                                                                                                                                                                                       |          |           |
| Latitude and longitude (Use the coordinate of GPS in a mobile phone)                                                                                                                                                                                                                                           | Latitude | Longitude |
| Interview Record                                                                                                                                                                                                                                                                                               |          |           |
| Date of Interview (dd/mm/yyyy)                                                                                                                                                                                                                                                                                 |          |           |
| Name of Key Informant (Last Name, First Name Middle Initial)                                                                                                                                                                                                                                                   |          |           |
| Type of Health facility                                                                                                                                                                                                                                                                                        |          |           |
| <b>Public Sector</b><br>1. Government hospital<br>2. Rural health unit/Urban health center /<br>Barangay Health center<br>3. Barangay health station<br>4. Barangay supply/Service point office/BHW<br>5. Other public (specify)<br><b>Other places</b><br>6. Puericulture center<br>7. Others (specify) _____ |          |           |

FACILITY NUMBER:

|        |          |          |      |    |
|--------|----------|----------|------|----|
|        |          |          |      |    |
| Region | Province | City/Mun | Brgy | No |

Section 1. Accreditations and certifications of health facility.

**[ANSWER ALL QUESTIONS. TAKE A PICTURE OF THE EVIDENCE AND INSERT TO THE RIGHT]**

|     | Item                                                    |                   | Write the response here | Insert Picture |
|-----|---------------------------------------------------------|-------------------|-------------------------|----------------|
| 101 | Phil Health Accredited                                  | 1 – Yes<br>2 - No |                         |                |
| 102 | Philippine Obstetrics and Gynecology Society Accredited | 1 – Yes<br>2 - No |                         |                |
| 103 | At least one staff certified on implant insertion       | 1 – Yes<br>2 - No |                         |                |
| 104 | Any other accreditation status?                         | Specify _____     |                         |                |

| Presence of Regular Health Personnel | 1-Yes 2-No |
|--------------------------------------|------------|
| Doctor                               |            |
| Dentist                              |            |
| Nurse                                |            |
| Midwife                              |            |

FACILITY NUMBER:

|        |          |          |      |    |
|--------|----------|----------|------|----|
|        |          |          |      |    |
| Region | Province | City/Mun | Brgy | No |

Section2. Commodity stocks and condition during past 12 months

**[ANSWER ALL QUESTIONS]**

|     | Commodity                           | Do you regularly provide/have any of the commodity listed below? <sup>a</sup><br>1-Yes 2-No | Are these available on the day of the visit?<br>1-Yes 2-No | Are stocks stored in normal condition <sup>b</sup> ?<br>1-Yes 2-No | Are there expired commodity?/<br>Are the equipment functional?<br>1-Yes 2-No | Are there stock records?<br><br>1-Yes 2-No | In 2016, how many times in a month that you did not have any stock? <sup>c</sup> | Price (Pesos)<br>(NO NEED TO FILL-OUT THOSE ITEMS WHICH THE HOSPITAL DOES NOT HAVE) |
|-----|-------------------------------------|---------------------------------------------------------------------------------------------|------------------------------------------------------------|--------------------------------------------------------------------|------------------------------------------------------------------------------|--------------------------------------------|----------------------------------------------------------------------------------|-------------------------------------------------------------------------------------|
| 201 | Condom                              |                                                                                             |                                                            |                                                                    |                                                                              |                                            |                                                                                  | /per piece                                                                          |
| 202 | Pill                                |                                                                                             |                                                            |                                                                    |                                                                              |                                            |                                                                                  | /per sheet                                                                          |
| 203 | Patch                               |                                                                                             |                                                            |                                                                    |                                                                              |                                            |                                                                                  | /per piece                                                                          |
| 204 | Injectable (e.g., Depo-Provera-DMPA |                                                                                             |                                                            |                                                                    |                                                                              |                                            |                                                                                  | /per kit                                                                            |
| 205 | Implants                            |                                                                                             |                                                            |                                                                    |                                                                              |                                            |                                                                                  | /per kit                                                                            |
| 206 | IUD                                 |                                                                                             |                                                            |                                                                    |                                                                              |                                            |                                                                                  | /per kit                                                                            |
| 207 | Equipment for Male sterilization    |                                                                                             |                                                            |                                                                    |                                                                              |                                            |                                                                                  | /per operation                                                                      |
| 208 | Equipment for Female sterilization  |                                                                                             |                                                            |                                                                    |                                                                              |                                            |                                                                                  | /per operation                                                                      |

<sup>a</sup>If the answer is no, there is no need to ask the columns to the right. Go to the next commodity.

<sup>b</sup> Clean, dry storage, away from direct sun and protected from extreme heat. (Family Planning. A global handbook for providers WHO 2011) [INTERVIEWER MUST SEE WHERE THE COMMODITY IS STORED AND IF THERE ARE EXPIRED COMMODITY]

<sup>c</sup> How many times in 2016 (January 2016 – December 2016) was the facility without any stock available (even if for one day only) = How many months was the stock not available for at least 1 day (x/12).
